# Supplementary material
Source: publisher site journal article supplement (https://www.spandidos-publications.com/209/downloadSupplementary)
Supplement: Supplementary file 1 [file downloadSupplementary]

Table SI. Patient information.

| Patient no. | Age (years) | Gender | miR-425-5p expression | HBV status (+/-) |
|-------------|-------------|--------|-----------------------|------------------|
| 1           | 43          | Male   | High                  | +                |
| 2           | 41          | Male   | High                  | -                |
| 3           | 34          | Male   | High                  | +                |
| 4           | 41          | Male   | High                  | +                |
| 5           | 31          | Male   | High                  | +                |
| 6           | 45          | Male   | High                  | +                |
| 7           | 37          | Male   | High                  | +                |
| 8           | 38          | Male   | High                  | +                |
| 9           | 46          | Male   | High                  | +                |
| 10          | 50          | Male   | High                  | +                |
| 11          | 51          | Male   | High                  | +                |
| 12          | 58          | Male   | High                  | +                |
| 13          | 61          | Male   | High                  | +                |
| 14          | 53          | Male   | High                  | +                |
| 15          | 58          | Male   | High                  | +                |
| 16          | 58          | Male   | Low                   | +                |
| 17          | 55          | Male   | Low                   | +                |
| 18          | 55          | Male   | Low                   | -                |
| 19          | 51          | Male   | Low                   | -                |
| 20          | 35          | Male   | Low                   | -                |
| 21          | 38          | Male   | Low                   | -                |
| 22          | 44          | Male   | Low                   | -                |
| 23          | 34          | Male   | Low                   | -                |
| 24          | 45          | Male   | Low                   | -                |
| 25          | 38          | Female | High                  | +                |
| 26          | 35          | Female | High                  | +                |
| 27          | 54          | Female | High                  | -                |
| 28          | 52          | Female | High                  | -                |
| 29          | 53          | Female | Low                   | +                |
| 30          | 45          | Female | Low                   | +                |

miR-425-5p, microRNA-425-5p; HBV, hepatitis B virus.

Table SII. FOXD3 promoter methylation in hepatocellular carcinoma tissues and HCCLM3 cells.

| Sample no. | Methylation | Non-methylation | CpG islands | Methylation of FOXD3 (%) |
|------------|-------------|-----------------|-------------|--------------------------|
| N1         | 6           | 17              | 23          | 26.09                    |
| N2         | 5           | 18              | 23          | 21.74                    |
| N3         | 3           | 16              | 23          | 13.04                    |
| N4         | 1           | 14              | 23          | 4.35                     |
| N5         | 4           | 19              | 23          | 17.39                    |
| N6         | 2           | 21              | 23          | 8.70                     |
| N7         | 10          | 15              | 23          | 43.48                    |
| N8         | 7           | 16              | 23          | 30.43                    |
| N9         | 1           | 18              | 23          | 4.35                     |
| N10        | 3           | 20              | 23          | 13.04                    |
| N11        | 5           | 13              | 23          | 21.74                    |
| N12        | 8           | 15              | 23          | 34.78                    |
| N13        | 6           | 17              | 23          | 26.09                    |
| N14        | 3           | 18              | 23          | 13.04                    |
| N15        | 6           | 17              | 23          | 26.09                    |
| N16        | 7           | 16              | 23          | 30.43                    |
| N17        | 2           | 21              | 23          | 8.70                     |
| N18        | 9           | 14              | 23          | 39.13                    |
| N19        | 3           | 13              | 23          | 13.04                    |
| N20        | 4           | 19              | 23          | 17.39                    |
| N21        | 3           | 20              | 23          | 13.04                    |
| N22        | 5           | 18              | 23          | 21.74                    |
| N23        | 9           | 15              | 23          | 39.13                    |
| N24        | 7           | 16              | 23          | 30.43                    |
| N25        | 11          | 15              | 23          | 47.83                    |
| N26        | 5           | 18              | 23          | 21.74                    |
| N27        | 2           | 14              | 23          | 8.70                     |
| N28        | 4           | 19              | 23          | 17.39                    |
| N29        | 6           | 17              | 23          | 26.09                    |
| N30        | 7           | 16              | 23          | 30.43                    |
| T1         | 20          | 3               | 23          | 86.96                    |
| T2         | 13          | 10              | 23          | 56.52                    |
| T3         | 15          | 8               | 23          | 65.22                    |
| T4         | 18          | 5               | 23          | 78.26                    |
| T5         | 14          | 9               | 23          | 60.87                    |
| T6         | 19          | 4               | 23          | 82.61                    |
| T7         | 17          | 6               | 23          | 73.91                    |
| T8         | 15          | 8               | 23          | 65.22                    |
| T9         | 14          | 9               | 23          | 60.87                    |
| T10        | 16          | 7               | 23          | 69.57                    |
| T11        | 17          | 6               | 23          | 73.91                    |
| T12        | 12          | 11              | 23          | 52.17                    |
| T13        | 13          | 10              | 23          | 56.52                    |
| T14        | 12          | 11              | 23          | 52.17                    |
| T15        | 18          | 5               | 23          | 78.26                    |
| T16        | 15          | 8               | 23          | 65.22                    |
| T17        | 18          | 5               | 23          | 78.26                    |
| T18        | 17          | 6               | 23          | 73.91                    |
| T19        | 12          | 11              | 23          | 52.17                    |
| T20        | 15          | 8               | 23          | 65.22                    |
| T21        | 13          | 10              | 23          | 56.52                    |
| T22        | 14          | 9               | 23          | 60.87                    |
| T23        | 16          | 7               | 23          | 69.57                    |
| T24        | 12          | 11              | 23          | 51.27                    |
| T25        | 19          | 4               | 23          | 82.61                    |
| T26        | 18          | 5               | 23          | 78.26                    |

Table SII. Continued.

| Sample no.   | Methylation | Non-methylation | CpG islands | Methylation of FOXD3 (%) |
|--------------|-------------|-----------------|-------------|--------------------------|
| T27          | 15          | 8               | 23          | 65.22                    |
| T28          | 12          | 11              | 23          | 52.17                    |
| T29          | 11          | 12              | 23          | 47.83                    |
| T30          | 15          | 8               | 23          | 65.22                    |
| HCCLM3 cells | 14          | 9               | 23          | 60.87                    |

N, normal tissue; T, tumor tissue; FOXD3, forkhead box D3.
